# Supplementary material for: Branch-like ZnS–DETA/CdS hierarchical heterostructures as an efficient photocatalyst for visible light CO2 reduction
Source: Royal Society of Chemistry journal article supplement (doi:10.1039/c9ta10470d), 2019-01-01
Supplement: c9ta10470d1.pdf [file c9ta10470d1.pdf]

## Electronic Supplementary Information

---

### Experimental details

*Materials characterization.* Powder X-ray diffraction (XRD) tests were carried out on a Bruker D8 Advance X-ray instrument (Cu  $K_{\alpha 1}$  radiation,  $\lambda = 1.5406 \text{ \AA}$ ) at a voltage of 40 kV and a current of 40 mA. Field-emission scanning electron microscope (FESEM; Helios G4 CX) and transmission electron microscope (TEM; JEOL, JEM-2010) were used to examine the morphology and structure of the samples. The compositions of the samples were determined by energy-dispersive X-ray spectroscopy (EDX) attached to scanning electron microscope (SEM; Quanta 250) and inductively coupled plasma emission spectrometer (iCAP7400). X-ray photoelectron spectroscopy (XPS) analysis and Ultraviolet photoelectron spectra were carried out on a PHI Quantum 2000 XPS system with C 1s binding energy (284.6 eV) as the reference and He I excitation (21.22 eV) as the monochromatic light source.  $N_2$  and  $CO_2$  adsorption–desorption isotherms characterizations were conducted on a Micromeritics ASAP2020 under liquid nitrogen temperature (77 K) and under mixture of ice and water (273 K). UV-vis diffuse reflectance spectra (DRS) were obtained using a Varian Cary 500 UV-vis spectrometer equipped with an integrating sphere, and  $BaSO_4$  was used as a reference. The room temperature photoluminescence (PL) characterizations were carried out on Hitachi F-7000 spectrophotometer. The fluorescence lifetime is determined by recording the time-resolved fluorescence emission spectra on a Deltapro Fluorescence Lifetime System. A Nicolet IS50 FTIR spectrometer (Thermo SCIENTIFIC) was employed to collect the Fourier transform infrared (FTIR) spectra. The electrochemical analysis carried out on Metrohm Autolab Electrochemical System, using a conventional three electrodes cell with Pt electrode and Ag/AgCl electrode as the counter electrode and reference electrode, respectively. Typically, 5 mg of the sample was dispersed in N, N-dimethylformamide (1 mL) by sonication to gain a

slurry. Then, the resultant slurry was spread onto the FTO glass with an area of ca. 0.25 cm<sup>2</sup>. The transient photocurrent response spectra were collected in Na<sub>2</sub>SO<sub>4</sub> aqueous solution (0.2 M) with a 300 W xenon lamp ( $\lambda \geq 420$  nm) as a light source. Electrochemical impedance spectroscopy (EIS) measurements were carried out at the open circuit potential. In situ electron spin resonance (ESR) measurement was then carried out on a Bruker A300 under liquid nitrogen temperature. Absorption spectra were obtained on a UV-vis spectrophotometer (HITACHI UH5300). The ESR tests were performed at liquid nitrogen temperature. A certain amount of ZnS-DETA/CdS, Co(bpy)<sub>3</sub><sup>2+</sup>, and mixed solution of H<sub>2</sub>O/ acetonitrile/TEOA were transferred into the ESR test tube, which was then bubbled with CO<sub>2</sub> for 5 min and sealed. A 300 W xenon lamp ( $\lambda \geq 420$  nm) was used as the light source. The UV-vis absorption experiments were conducted at room temperature. Typically, 4 mg of photocatalyst, 8  $\mu$ mol of CoCl<sub>2</sub>, 400  $\mu$ mol of 2'2'-bipyridine (bpy), 16 mL of acetonitrile, 4 mL of H<sub>2</sub>O, and 4 mL of TEOA were added into a glass beaker to get a uniform suspension. Then, 3 mL of the suspension was transferred into the quartz cuvette. The suspension in quartz cuvette was bubbled with CO<sub>2</sub> for 10 min and sealed. A 300 W xenon lamp ( $\lambda \geq 420$  nm) was used as the light source.

The produced gases after photocatalytic CO<sub>2</sub> reduction reactions were analyzed and quantified by an Agilent 7890B gas chromatography (GC). The H<sub>2</sub> gas was analyzed and quantified by the GC equipped with a thermal conductivity detector (TCD) and a TDX-1 packed column. The CO product was converted to CH<sub>4</sub> by a methanizer and then analyzed by a flame ionization detector (FID). Ar was used as the carrier gas. A HP5973 gas chromatography-mass spectrometry (GC-MS) was employed to detect the <sup>13</sup>CO generated from the <sup>13</sup>CO<sub>2</sub> isotopic experiment.

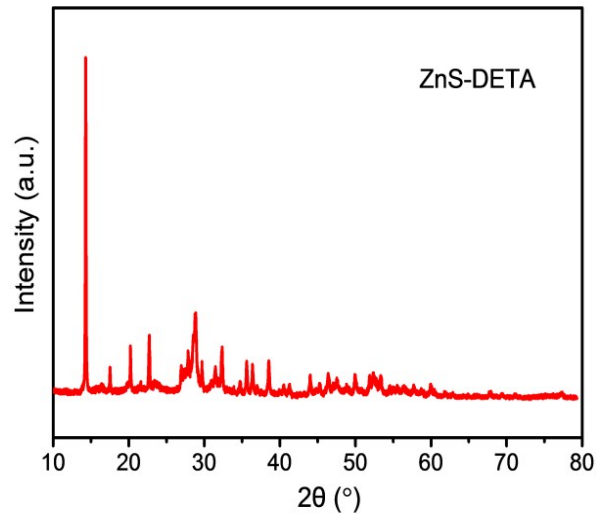

**Fig. S1** XRD pattern of ZnS-DETA hybrid nanosheets.

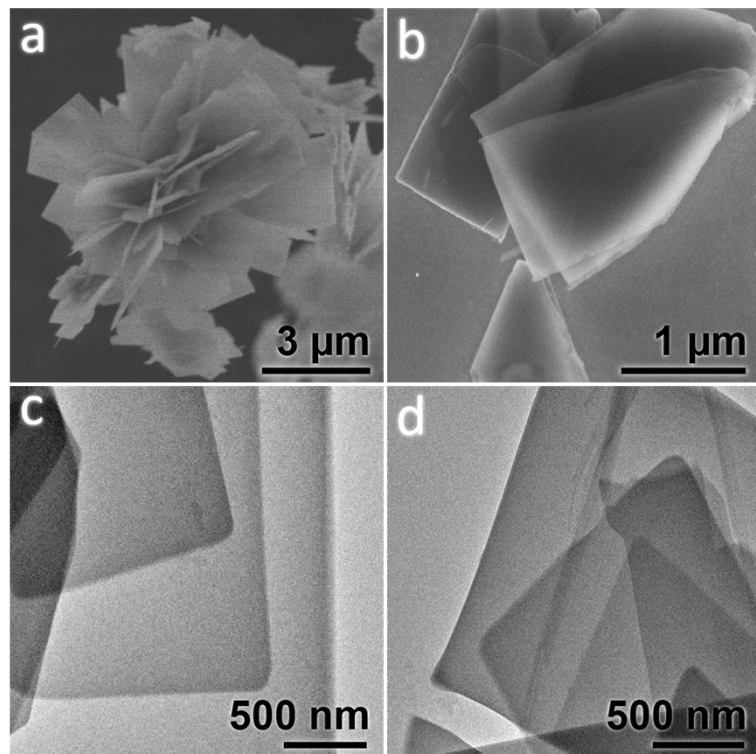

**Fig. S2** (a,b) FESEM images and (c,d) TEM images of ZnS-DETA nanosheets.

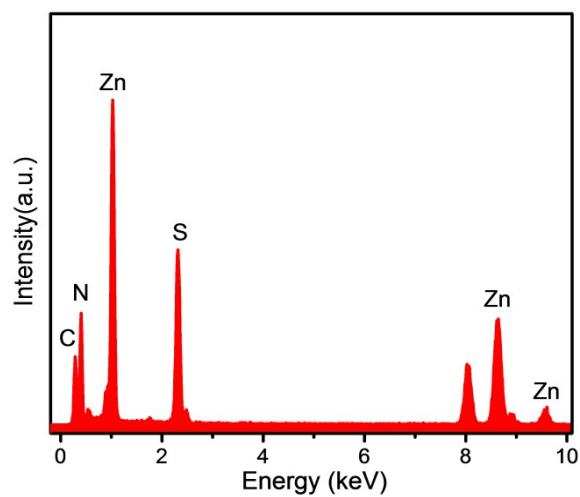

**Fig. S3** EDX spectrum of ZnS-DETA hybrid nanosheets.

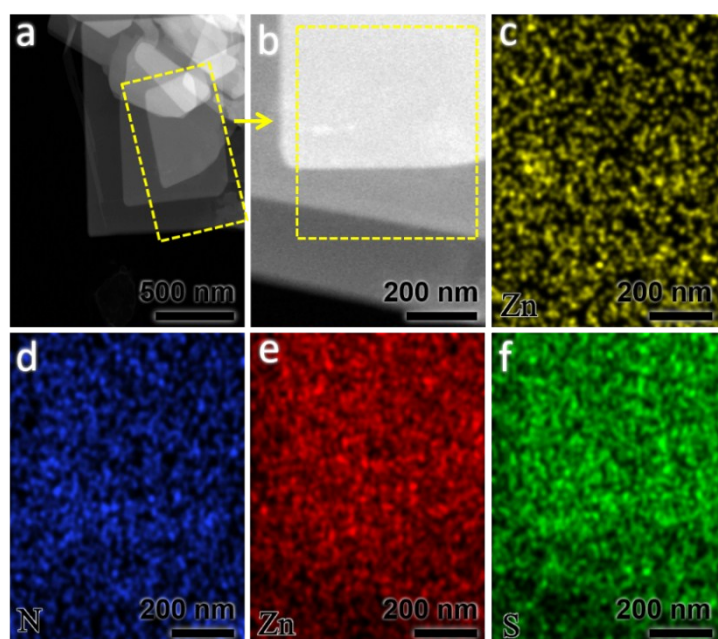

**Fig. S4** (a,b) TEM images and (c-f) elemental mapping images of ZnS-DETA hybrid nanosheets.

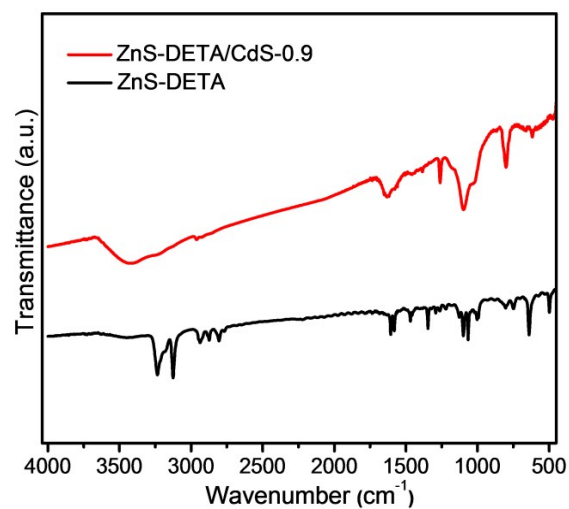

**Fig. S5** FTIR spectra of ZnS-DETA and ZnS-DETA/CdS.

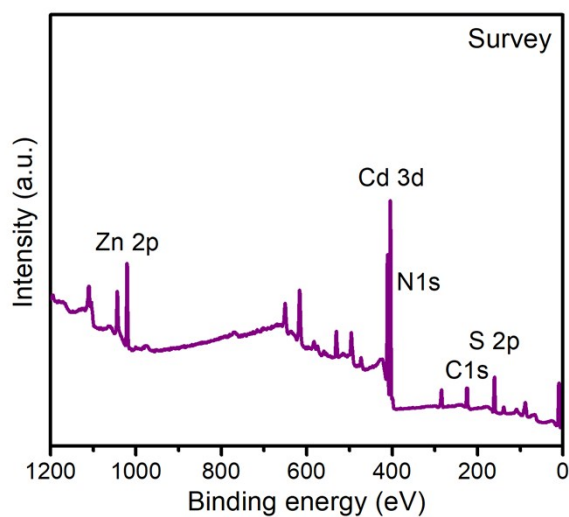

**Fig. S6** Survey XPS spectrum of ZnS-DETA/CdS.

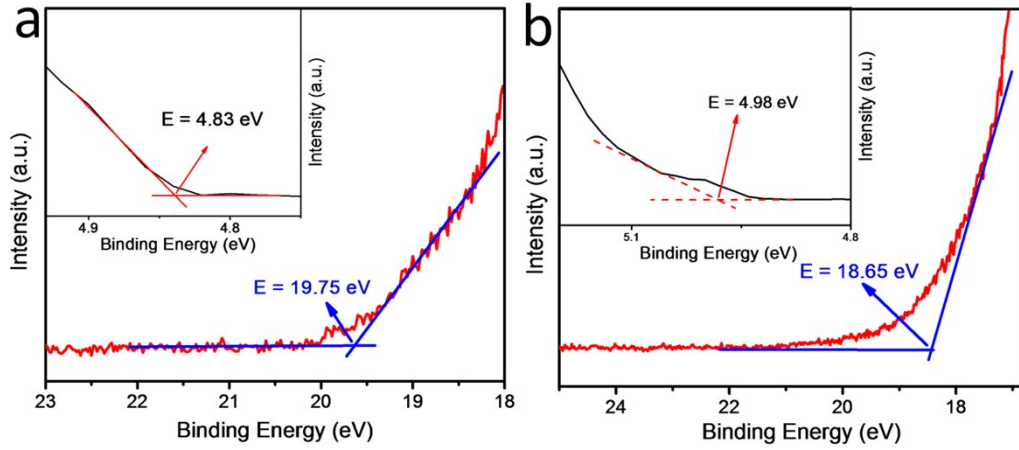

**Fig. S7** UPS spectra of (a) CdS and (b) ZnS-DETA. The inset shows the onset values for the valence band.

A complete description of the calculation process of the valence band maximum and the minimum of the conduction band from UPS spectra.

The work function ( $\phi$ ) can be calculated using Eq. (1):  $\phi = h\nu - E_{\text{SEO}}$ . Here,  $h\nu = 21.22$  eV, represents the energy of the monochromatic ionizing light, while  $E_{\text{SEO}}$  is the secondary electron onset, obtained from the linear extrapolation of the UPS spectrum.

The Fermi level ( $E_{\text{F}}$ ) is obtained from the work function using Eq. (2):  $E_{\text{F}} = -\phi$ .

The position of the valence band maximum ( $E_{\text{VB}}$ ) is obtained from Eq. (3):  $E_{\text{VB}} = E_{\text{F}} - X$ , in which  $X$  is obtained from the extrapolation of the onsets in the UPS spectrum.

The conduction band minimum potential ( $E_{\text{CB}}$ ) is obtained from Eq. (4):  $E_{\text{CB}} = E_{\text{VB}} + E_{\text{BG}} = E_{\text{F}} - X + E_{\text{BG}}$ . Here, the bandgap energy  $E_{\text{BG}}$  is obtained by Tauc plots.

The conduction band (CB) positions of CdS and ZnS-DETA are determined by the UPS spectra. The work function of CdS was estimated to be 1.47 eV, applying the method of a linear approximation to the UPS spectra. The Fermi level of CdS was estimated to be -1.47 eV. Simultaneously, the valence band maximum was calculated to be -6.30 eV. The average band gap energy value (2.49 eV for CdS) obtained from the Tauc plots (Figure 6b). The minimum of the conduction

band is located at -3.90 eV. The calculated potentials refer to the vacuum level ( $E_{\text{Vac}}$ ). Therefore, according to the relationship between the potential of the reversible hydrogen electrode (RHE) and  $E_{\text{Vac}}$  (i.e.,  $E_{\text{RHE}} = -E_{\text{Vac}} - 4.44$ ), the conduction and valence band of CdS are determined to be -0.63 and 1.86 V vs. RHE, respectively. The value of the potential of RHE equals to the normal hydrogen electrode (NHE) at pH = 0. The conduction and valence band of CdS are located at -1.04 and 1.45 V (vs. NHE, pH=7), respectively. Similarly, the valence band maximum and the minimum of the conduction band of ZnS-DETA are 2.74 and -0.70 V (vs. NHE, pH=7), respectively.

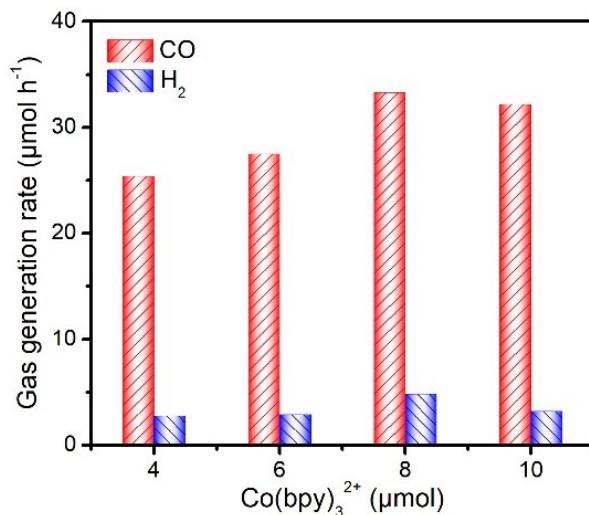

**Fig. S8** Photocatalytic CO<sub>2</sub> reduction performance of ZnS-DETA/CdS with different amounts of Co(bpy)<sub>3</sub><sup>2+</sup> (Co<sup>2+</sup>/bpy = 1:50) added in the reaction system. Reaction conditions: ZnS-DETA/CdS (4 mg), TEOA (4 ml), acetonitrile (16 ml), H<sub>2</sub>O (4 ml), CO<sub>2</sub> (1 atm), and visible light irradiation ( $\lambda \geq 420$  nm).

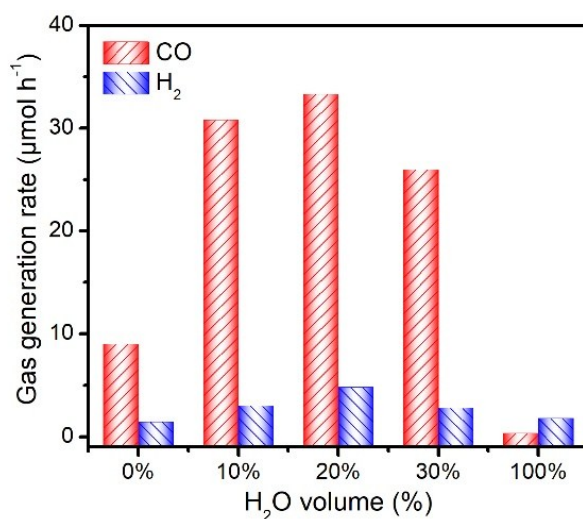

**Fig. S9** Photocatalytic CO<sub>2</sub> reduction performance of ZnS-DETA/CdS in the reaction systems with different volumetric ratios of H<sub>2</sub>O in the mixture solvent of H<sub>2</sub>O/MeCN.



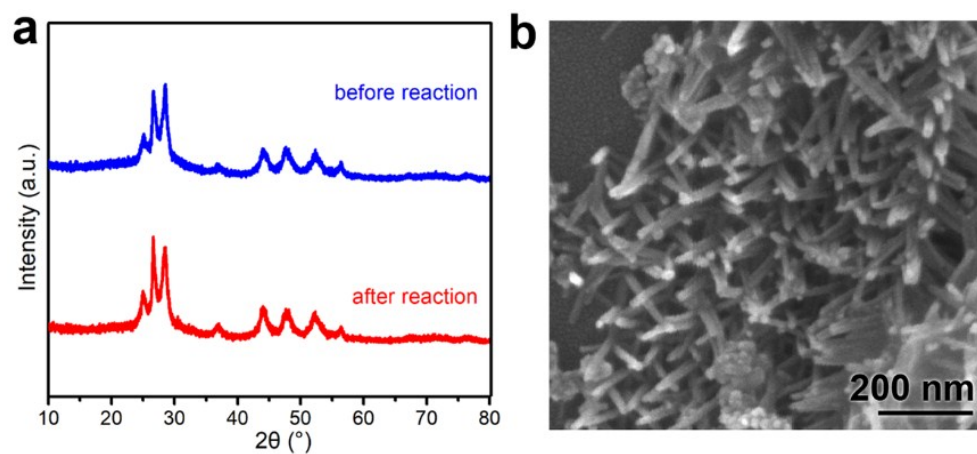

**Fig. S10** (a) XRD patterns of fresh and used ZnS-DETA/CdS sample and (b) FESEM image of used ZnS-DETA/CdS sample.

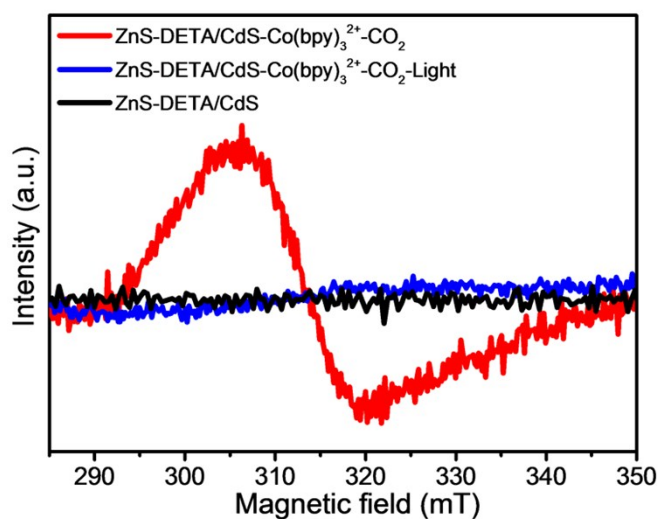

**Fig. S11** ESR spectra of the photocatalytic CO<sub>2</sub> reduction systems under different conditions.

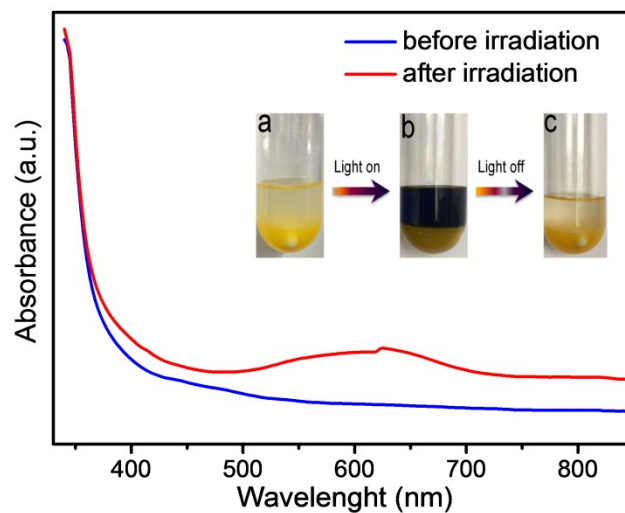

**Fig. S12** UV-vis absorption spectra of the photocatalytic CO<sub>2</sub> reduction systems before and after visible light irradiation. Insets are the corresponding photographs: (a) the fresh reaction mixture, (b) upon visible light irradiation and (c) after the reaction light.

**Table S1.** Molar ratios of Zn/Cd of different samples determined by ICP-OES.

| Sample            | Zn/Cd   |
|-------------------|---------|
| ZnS-DETA/CdS-0.50 | 1: 2.34 |
| ZnS-DETA/CdS-0.85 | 1: 2.55 |
| ZnS-DETA/CdS-0.90 | 1: 2.58 |
| ZnS-DETA/CdS-0.95 | 1: 2.63 |

**Table S2.** Comparison of CO generation rate of ZnS-DETA/CdS with those of other catalysts in similar CO<sub>2</sub> photoreduction systems using Co(bpy)<sub>3</sub><sup>2+</sup> as a cocatalyst.

| Catalyst<br>(used amount)                                                 | Cocatalyst                         | Sacrificial<br>agent | CO evolution rate <sup>a</sup><br>(μmol h <sup>-1</sup> ) | Ref.         |
|---------------------------------------------------------------------------|------------------------------------|----------------------|-----------------------------------------------------------|--------------|
| ZnS-DETA/CdS<br>(4 mg)                                                    | Co(bpy) <sub>3</sub> <sup>2+</sup> | TEOA                 | CO: 33.3                                                  | This<br>work |
| CdS/BCN<br>(50mg)                                                         | Co(bpy) <sub>3</sub> <sup>2+</sup> | TEOA                 | CO: 12.5                                                  | 1            |
| CdS/ZIF-8<br>(40 mg)                                                      | Co(bpy) <sub>3</sub> <sup>2+</sup> | TEOA                 | CO: 32.1                                                  | 2            |
| Au(25)@CdS<br>(4 mg)                                                      | Co(bpy) <sub>3</sub> <sup>2+</sup> | TEOA                 | CO: 15                                                    | 3            |
| PCN/ZnIn <sub>2</sub> S <sub>4</sub><br>(50mg)                            | Co(bpy) <sub>3</sub> <sup>2+</sup> | TEOA                 | CO: 44.6                                                  | 4            |
| ZnIn <sub>2</sub> S <sub>4</sub> -In <sub>2</sub> O <sub>3</sub><br>(4mg) | Co(bpy) <sub>3</sub> <sup>2+</sup> | TEOA                 | CO: 12.3                                                  | 5            |
| CNU-BA0.03<br>(30 mg)                                                     | Co(bpy) <sub>3</sub> <sup>2+</sup> | TEOA                 | CO: 31.1                                                  | 6            |
| 2D TiO-CN<br>(3 mg)                                                       | Co(bpy) <sub>3</sub> <sup>2+</sup> | TEOA                 | CO: 0.85                                                  | 7            |
| In <sub>2</sub> S <sub>3</sub> -CdIn <sub>2</sub> S <sub>4</sub><br>(4mg) | Co(bpy) <sub>3</sub> <sup>2+</sup> | TEOA                 | CO: 3.3                                                   | 8            |
| DA-CTF<br>(30 mg)                                                         | Co(bpy) <sub>3</sub> <sup>2+</sup> | TEOA                 | CO: 4                                                     | 9            |
| Co <sub>4</sub> @g-C <sub>3</sub> N <sub>4</sub><br>(50 mg)               | Co(bpy) <sub>3</sub> <sup>2+</sup> | TEOA                 | CO: 5.4                                                   | 10           |

<sup>a</sup>The CO evolution rate is calculated based on the used amount of catalyst in the reaction system.

### Supplementary References

1. M. Zhou, S. Wang, P. Yang, C. Huang and X. Wang, *ACS Catal.*, 2018, **8**, 4928-4936.
2. Y. Liu, L. Deng, J. Sheng, F. Tang, K. Zeng, L. Wang, K. Liang, H. Hu and Y.-N. Liu, *Appl. Surface Sci.*, 2019, **498**, 143899.
3. P. Zhang, S. Wang, B. Y. Guan and X. W. Lou, *Energy Environ. Sci.*, 2019, **12**, 164-168.
4. M. Zhou, S. Wang, P. Yang, Z. Luo, R. Yuan, A. M. Asiri, M. Wakeel and X. Wang, *Chem. Eur. J.*, 2018, **24**, 18529-18534.
5. S. Wang, B. Y. Guan and X. W. Lou, *J. Am. Chem. Soc.*, 2018, **140**, 5037-5040.
6. J. Qin, S. Wang, H. Ren, Y. Hou and X. Wang, *Appl. Catal. B Environ.*, 2015, **179**, 1-8.
7. S. Tang, X. Yin, G. Wang, X. Lu and T. Lu, *Nano Res.*, 2018, **12**, 457-462.
8. S. Wang, B. Y. Guan, Y. Lu and X. W. Lou, *J. Am. Chem. Soc.*, 2017, **139**, 17305-17308.

9. H. Zhong, Z. Hong, C. Yang, L. Li, Y. Xu, X. Wang and R. Wang, *ChemSusChem*, 2019, **12**, 4493-4499.
10. J. Zhou, W. Chen, C. Sun, L. Han, C. Qin, M. Chen, X. Wang, E. Wang and Z. Su, *ACS Appl. Mater. Interfaces*, 2017, **9**, 11689-11695.
